# Supplementary material for: Will Casuarina glauca Stress Resilience Be Maintained in the Face of Climate Change?
Source: MDPI journal article supplement (doi:10.3390/metabo11090593), 2021-09-02
Supplement: s1 [file s1]

## **Supplementary Information Table S1**

**Article title:** Will *Casuarina glauca* stress resilience be maintained in the face of climate change?

**Authors:** Tiago F. Jorge, José C. Ramalho, Saleh Alseekh, Isabel P. Pais, António E. Leitão, Ana P. Rodrigues, Paula Scotti-Campos, Ana I. Ribeiro-Barros, Alisdair R. Fernie and Carla António

**Table S1** Photosynthetic pigments – HPLC chromatograms

0 mM NaCl, T= 26°C

1

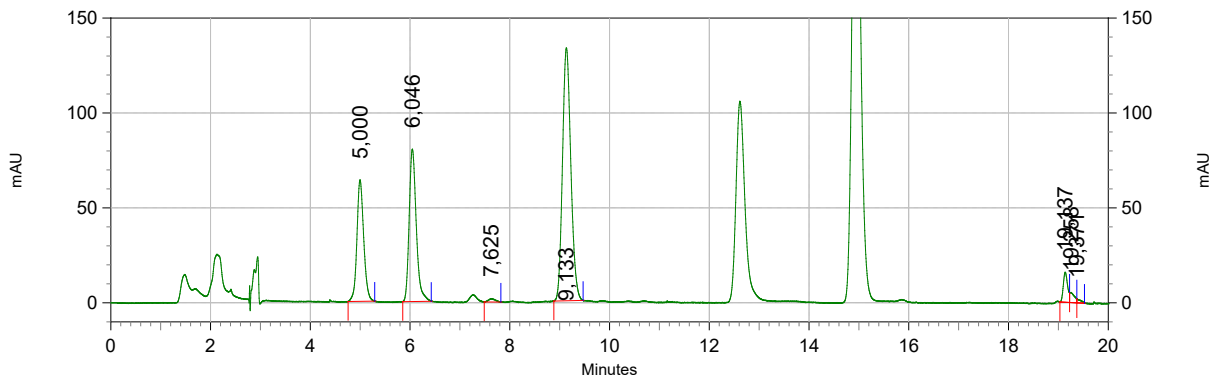

Det 168-440nm

| Name          | Retention Time | Area    | Area Percent |
|---------------|----------------|---------|--------------|
| Neoxanthin    | 5.000          | 604162  | 19.477       |
| Violaxanthin  | 6.046          | 791475  | 25.515       |
| Anteraxanthin | 7.625          | 16408   | 0.529        |
| Lutein        | 9.133          | 1550615 | 49.988       |
| Zeaxanthin    |                | 0       |              |
| Alfa carotene | 19.137         | 94505   | 3.047        |
| Beta carotene | 19.258         | 34430   | 1.110        |

2

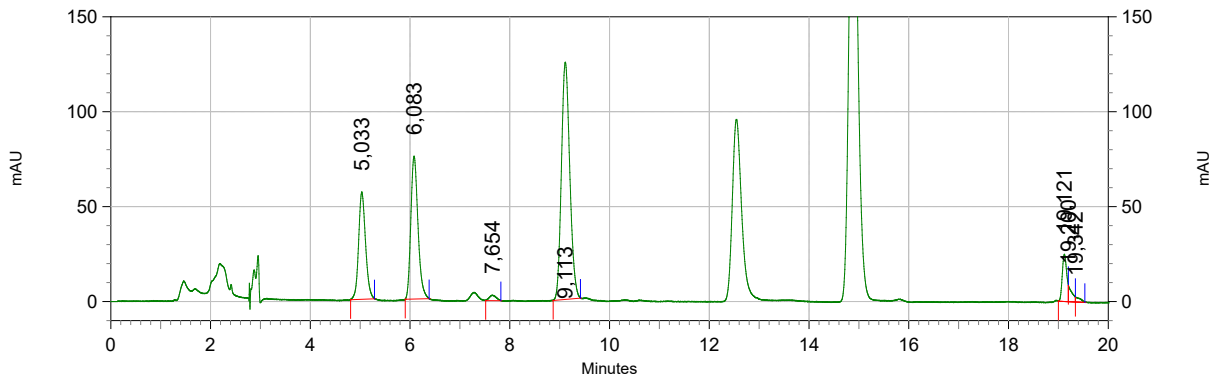

Det 168-440nm

| Name          | Retention Time | Area    | Area Percent |
|---------------|----------------|---------|--------------|
| Neoxanthin    | 5.033          | 543465  | 18.261       |
| Violaxanthin  | 6.083          | 745318  | 25.043       |
| Anteraxanthin | 7.654          | 26086   | 0.877        |
| Lutein        | 9.113          | 1452883 | 48.817       |
| Zeaxanthin    |                | 0       |              |
| Alfa carotene | 19.121         | 151389  | 5.087        |
| Beta carotene | 19.200         | 41480   | 1.394        |

3

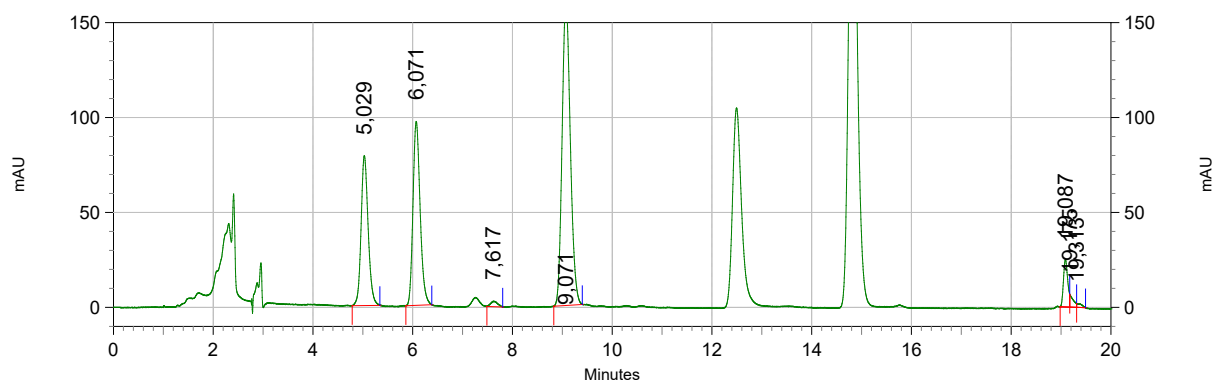

Det 168-440nm

| Name          | Retention Time | Area    | Area Percent |
|---------------|----------------|---------|--------------|
| Neoxanthin    | 5.029          | 774619  | 20.366       |
| Violaxanthin  | 6.071          | 962543  | 25.307       |
| Anteraxanthin | 7.617          | 27246   | 0.716        |
| Lutein        | 9.071          | 1845081 | 48.510       |
| Zeaxanthin    |                | 0       |              |
| Alfa carotene | 19.087         | 147845  | 3.887        |
| Beta carotene | 19.175         | 32756   | 0.861        |

400 mM NaCl, T= 26°C

5

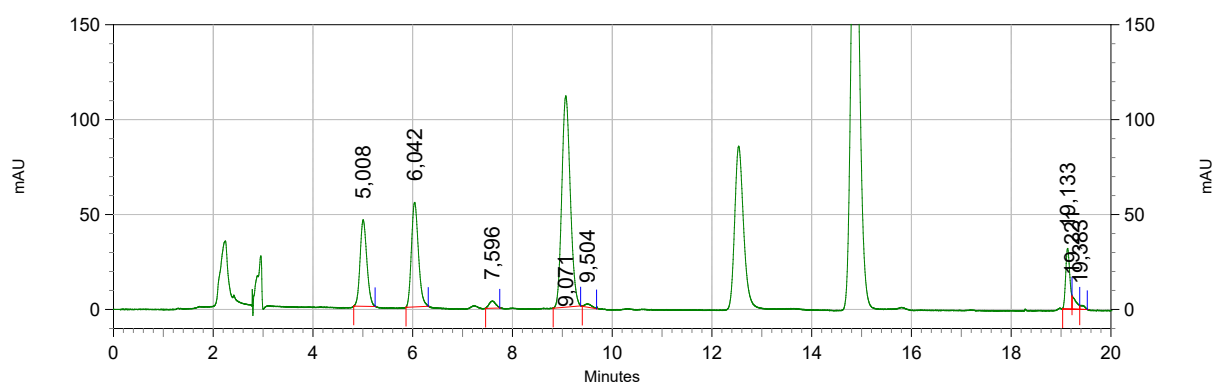

Det 168-440nm

| Name          | Retention Time | Area    | Area Percent |
|---------------|----------------|---------|--------------|
| Neoxanthin    | 5.008          | 426485  | 16.744       |
| Violaxanthin  | 6.042          | 532038  | 20.888       |
| Anteraxanthin | 7.596          | 33049   | 1.297        |
| Lutein        | 9.071          | 1310319 | 51.443       |
| Zeaxanthin    | 9.504          | 14766   | 0.580        |
| Alfa carotene | 19.133         | 181975  | 7.144        |
| Beta carotene | 19.221         | 37059   | 1.455        |

6

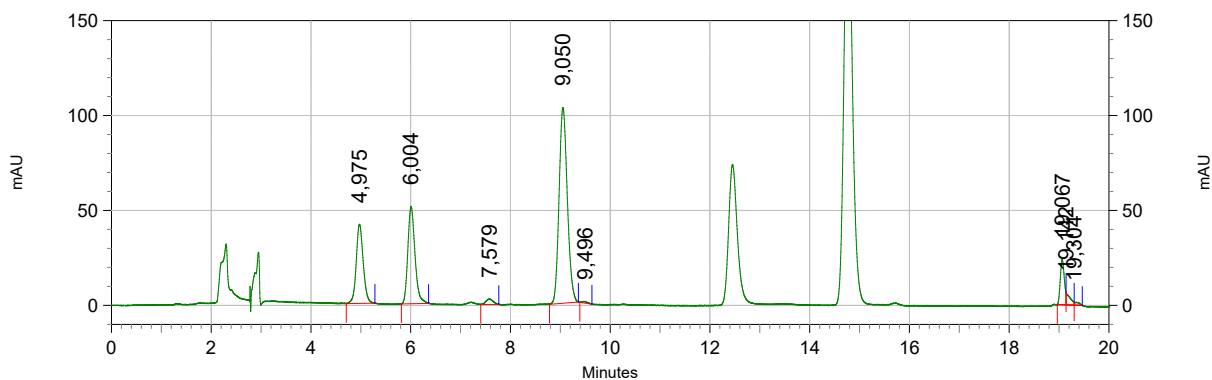

Det 168-440nm

| Name          | Retention Time | Area    | Area Percent |
|---------------|----------------|---------|--------------|
| Neoxanthin    | 4.975          | 405382  | 17.550       |
| Violaxanthin  | 6.004          | 508922  | 22.032       |
| Anteraxanthin | 7.579          | 28155   | 1.219        |
| Lutein        | 9.050          | 1182237 | 51.181       |
| Zeaxanthin    | 9.496          | 6162    | 0.267        |
| Alfa carotene | 19.067         | 133180  | 5.766        |
| Beta carotene | 19.142         | 35742   | 1.547        |

8

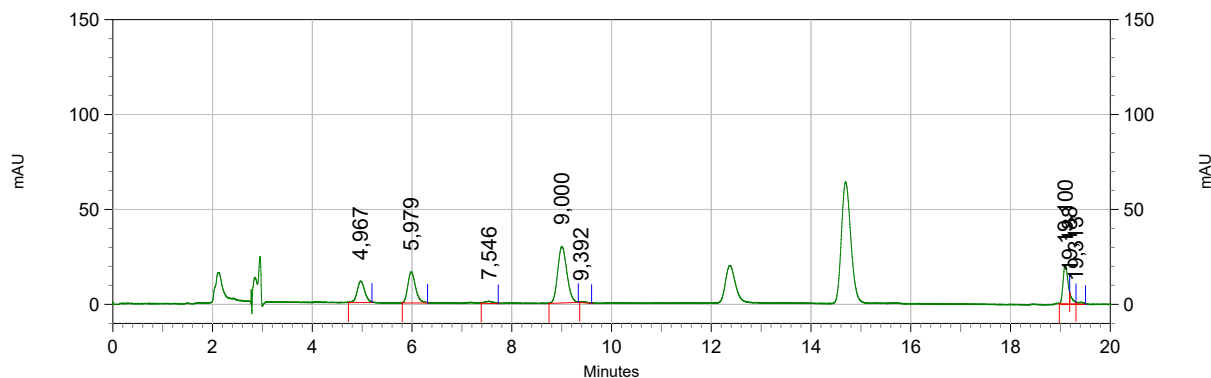

Det 168-440nm

| Name          | Retention Time | Area   | Area Percent |
|---------------|----------------|--------|--------------|
| Neoxanthin    | 4.967          | 116454 | 13.844       |
| Violaxanthin  | 5.979          | 173284 | 20.599       |
| Anteraxanthin | 7.546          | 10742  | 1.277        |
| Lutein        | 9.000          | 376612 | 44.770       |
| Zeaxanthin    | 9.392          | 2846   | 0.338        |
| Alfa carotene | 19.100         | 134511 | 15.990       |
| Beta carotene | 19.188         | 19082  | 2.268        |

0 mM NaCl, T= 35°C

10

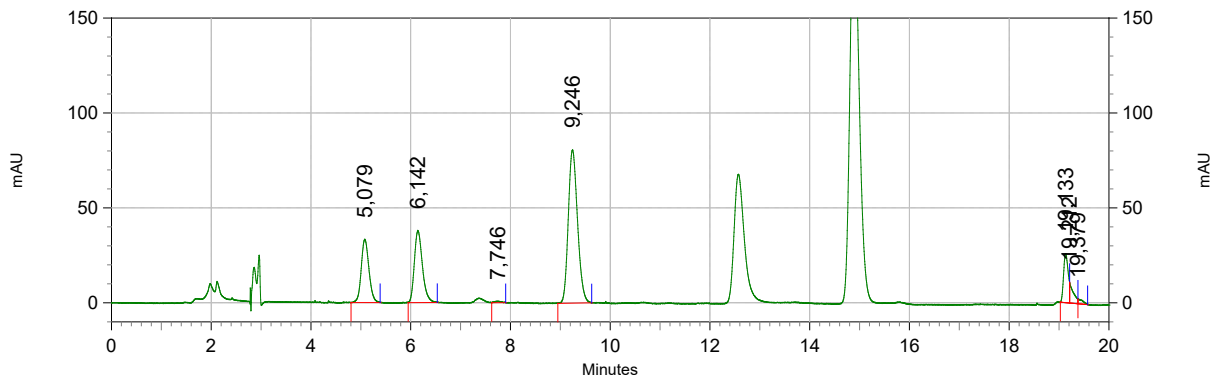

Det 168-440nm

| Name          | Retention Time | Area    | Area Percent |
|---------------|----------------|---------|--------------|
| Neoxanthin    | 5.079          | 356713  | 17.307       |
| Violaxanthin  | 6.142          | 425094  | 20.625       |
| Anteraxanthin | 7.746          | 6816    | 0.331        |
| Lutein        | 9.246          | 1036667 | 50.297       |
| Zeaxanthin    |                | 0       |              |
| Alfa carotene | 19.133         | 162898  | 7.904        |
| Beta carotene | 19.212         | 56432   | 2.738        |

16

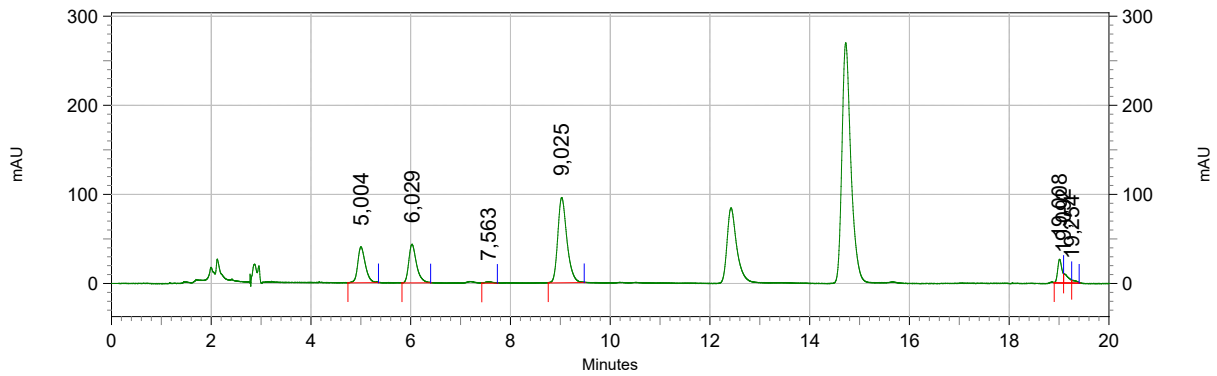

Det 168-440nm

| Name          | Retention Time | Area    | Area Percent |
|---------------|----------------|---------|--------------|
| Neoxanthin    | 5.004          | 424455  | 18.162       |
| Violaxanthin  | 6.029          | 463677  | 19.841       |
| Anteraxanthin | 7.563          | 11726   | 0.502        |
| Lutein        | 9.025          | 1207669 | 51.676       |
| Zeaxanthin    |                | 0       |              |
| Alfa carotene | 19.008         | 152266  | 6.515        |
| Beta carotene | 19.092         | 62253   | 2.664        |

17

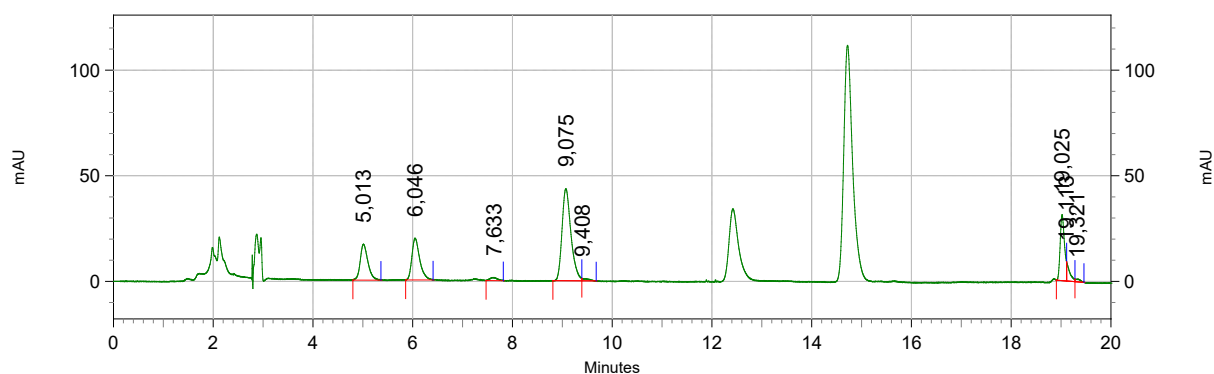

Det 168-440nm

| Name          | Retention Time | Area   | Area Percent |
|---------------|----------------|--------|--------------|
| Neoxanthin    | 5.013          | 182530 | 15.258       |
| Violaxanthin  | 6.046          | 215234 | 17.991       |
| Anteraxanthin | 7.633          | 15216  | 1.272        |
| Lutein        | 9.075          | 540266 | 45.161       |
| Zeaxanthin    | 9.408          | 9061   | 0.757        |
| Alfa carotene | 19.025         | 187214 | 15.649       |
| Beta carotene | 19.113         | 37876  | 3.166        |

18

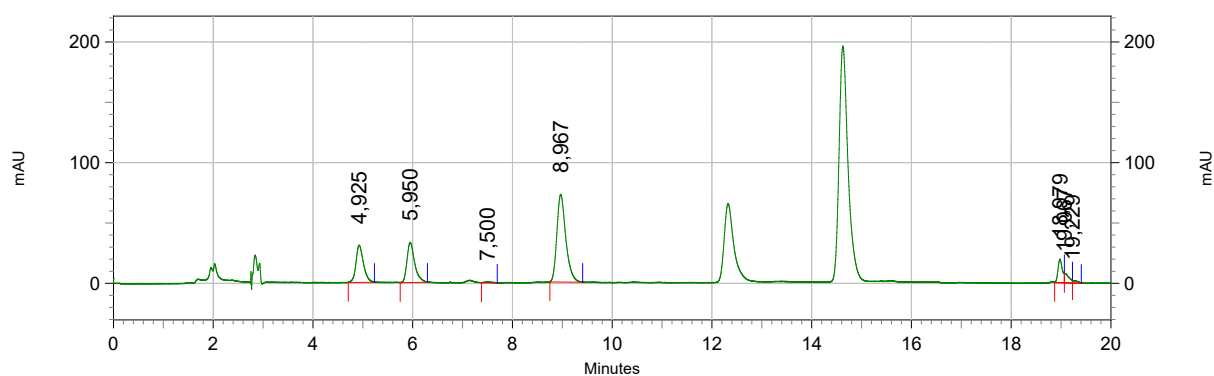

Det 168-440nm

| Name          | Retention Time | Area   | Area Percent |
|---------------|----------------|--------|--------------|
| Neoxanthin    | 4.925          | 319474 | 18.207       |
| Violaxanthin  | 5.950          | 352917 | 20.113       |
| Anteraxanthin | 7.500          | 8272   | 0.471        |
| Lutein        | 8.967          | 899786 | 51.280       |
| Zeaxanthin    |                | 0      |              |
| Alfa carotene | 18.979         | 115866 | 6.603        |
| Beta carotene | 19.067         | 46919  | 2.674        |

400 mM NaCl, T= 35°C

4

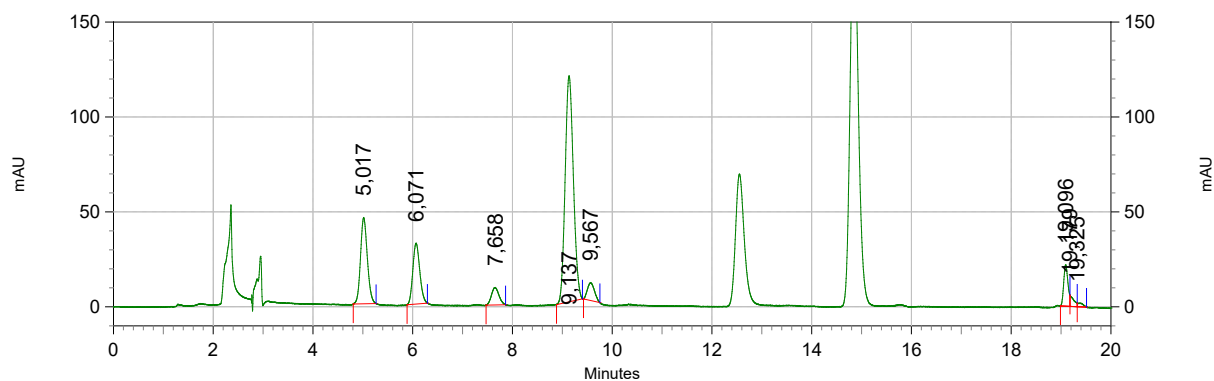

Det 168-440nm

| Name          | Retention Time | Area    | Area Percent |
|---------------|----------------|---------|--------------|
| Neoxanthin    | 5.017          | 431137  | 17.488       |
| Violaxanthin  | 6.071          | 309627  | 12.559       |
| Anteraxanthin | 7.658          | 95564   | 3.876        |
| Lutein        | 9.137          | 1361881 | 55.241       |
| Zeaxanthin    | 9.567          | 92365   | 3.747        |
| Alfa carotene | 19.096         | 128814  | 5.225        |
| Beta carotene | 19.179         | 31543   | 1.279        |

9

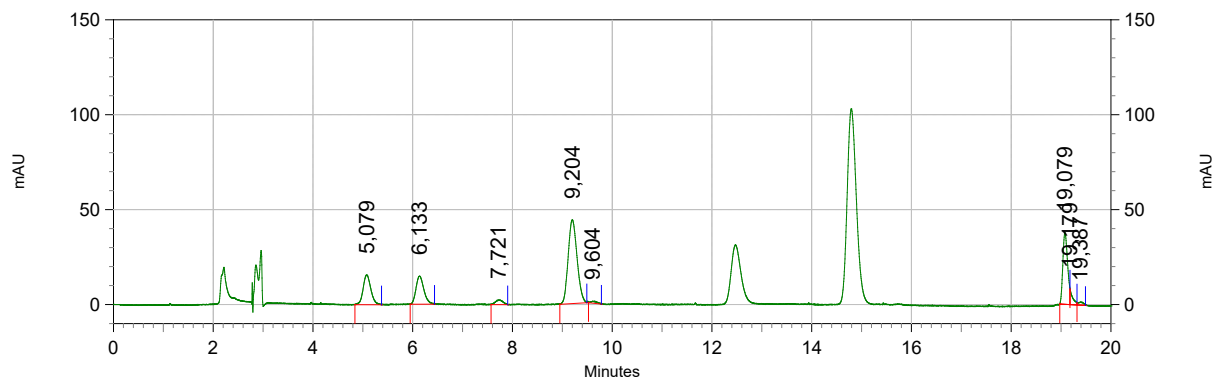

Det 168-440nm

| Name          | Retention Time | Area   | Area Percent |
|---------------|----------------|--------|--------------|
| Neoxanthin    | 5.079          | 167498 | 14.115       |
| Violaxanthin  | 6.133          | 160013 | 13.485       |
| Anteraxanthin | 7.721          | 24203  | 2.040        |
| Lutein        | 9.204          | 542368 | 45.707       |
| Zeaxanthin    | 9.604          | 7774   | 0.655        |
| Alfa carotene | 19.079         | 247223 | 20.834       |
| Beta carotene | 19.179         | 27704  | 2.335        |

13

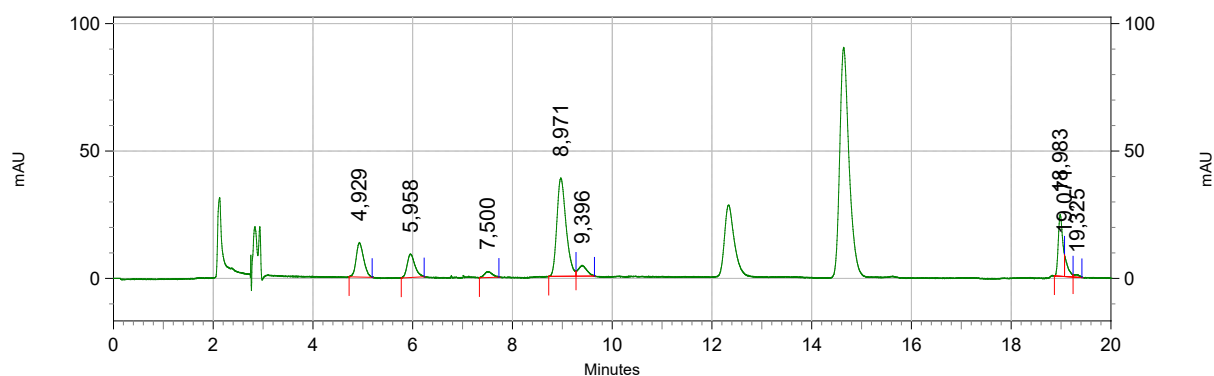

Det 168-440nm

| Name          | Retention Time | Area   | Area Percent |
|---------------|----------------|--------|--------------|
| Neoxanthin    | 4.929          | 140852 | 14.092       |
| Violaxanthin  | 5.958          | 98812  | 9.886        |
| Anteraxanthin | 7.500          | 25301  | 2.531        |
| Lutein        | 8.971          | 493183 | 49.341       |
| Zeaxanthin    | 9.396          | 49692  | 4.971        |
| Alfa carotene | 18.983         | 148306 | 14.837       |
| Beta carotene | 19.071         | 35789  | 3.581        |

20

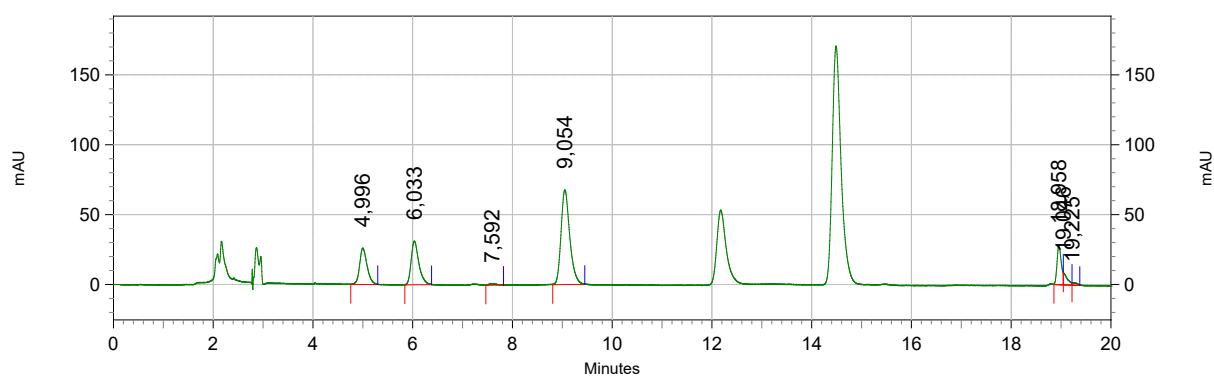

Det 168-440nm

| Name          | Retention Time | Area   | Area Percent |
|---------------|----------------|--------|--------------|
| Neoxanthin    | 4.996          | 269239 | 16.325       |
| Violaxanthin  | 6.033          | 333525 | 20.223       |
| Anteraxanthin | 7.592          | 10119  | 0.614        |
| Lutein        | 9.054          | 817914 | 49.595       |
| Zeaxanthin    |                | 0      |              |
| Alfa carotene | 18.958         | 164407 | 9.969        |
| Beta carotene | 19.046         | 44856  | 2.720        |



0 mM NaCl, T= 45°C

11

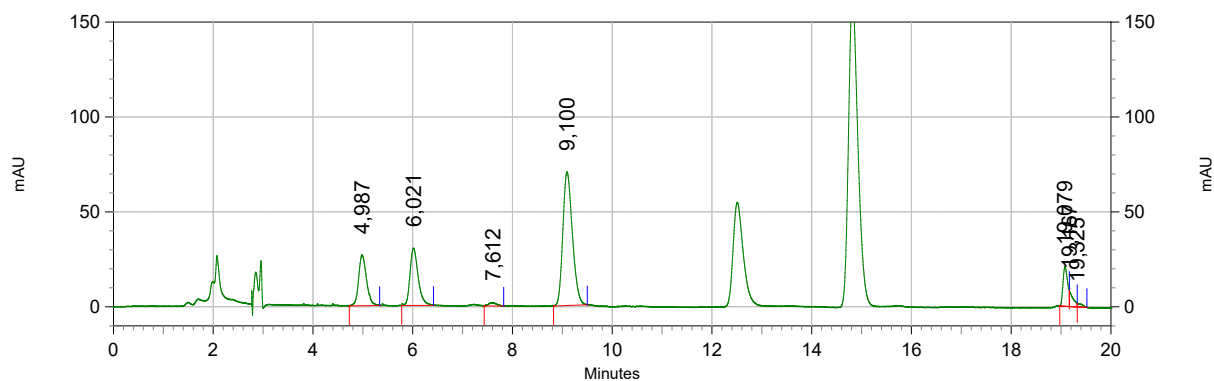

Det 168-440nm

| Name          | Retention Time | Area   | Area Percent |
|---------------|----------------|--------|--------------|
| Neoxanthin    | 4.987          | 293062 | 16.480       |
| Violaxanthin  | 6.021          | 342026 | 19.233       |
| Anteraxanthin | 7.612          | 19812  | 1.114        |
| Lutein        | 9.100          | 934275 | 52.537       |
| Zeaxanthin    |                | 0      |              |
| Alfa carotene | 19.079         | 134398 | 7.558        |
| Beta carotene | 19.167         | 42422  | 2.386        |

14

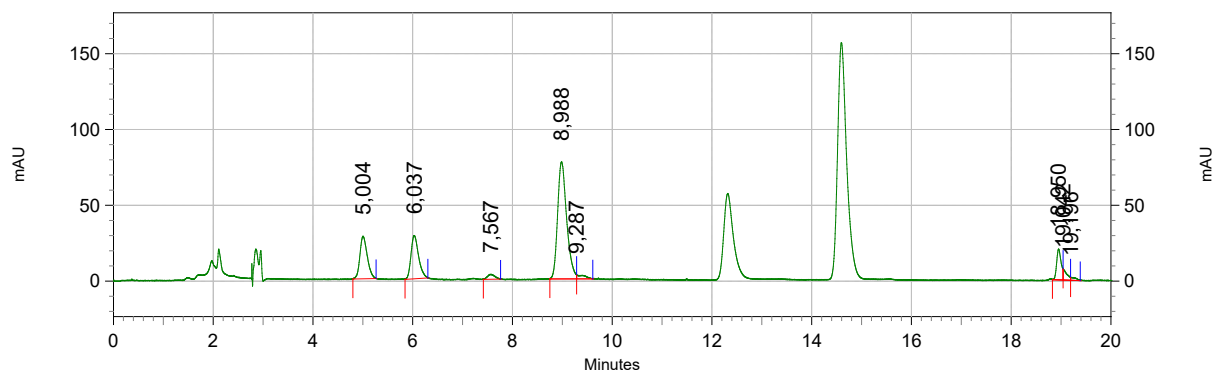

Det 168-440nm

| Name          | Retention Time | Area   | Area Percent |
|---------------|----------------|--------|--------------|
| Neoxanthin    | 5.004          | 287209 | 16.126       |
| Violaxanthin  | 6.037          | 299474 | 16.815       |
| Anteraxanthin | 7.567          | 30798  | 1.729        |
| Lutein        | 8.988          | 966063 | 54.242       |
| Zeaxanthin    | 9.287          | 26709  | 1.500        |
| Alfa carotene | 18.950         | 123449 | 6.931        |
| Beta carotene | 19.042         | 35550  | 1.996        |

19

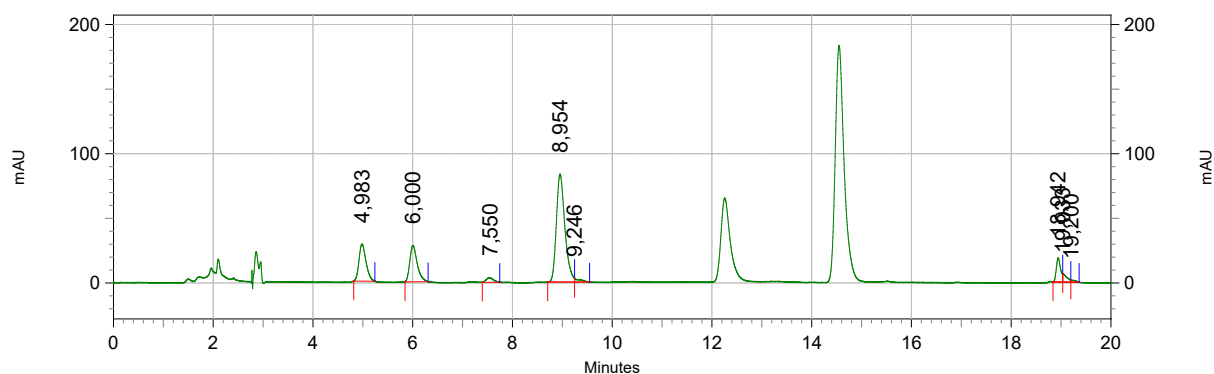

Det 168-440nm

| Name          | Retention Time | Area   | Area Percent |
|---------------|----------------|--------|--------------|
| Neoxanthin    | 4.983          | 280820 | 15.799       |
| Violaxanthin  | 6.000          | 290722 | 16.356       |
| Anteraxanthin | 7.550          | 35409  | 1.992        |
| Lutein        | 8.954          | 990184 | 55.707       |
| Zeaxanthin    | 9.246          | 22015  | 1.239        |
| Alfa carotene | 18.942         | 110254 | 6.203        |
| Beta carotene | 19.033         | 37784  | 2.126        |

22

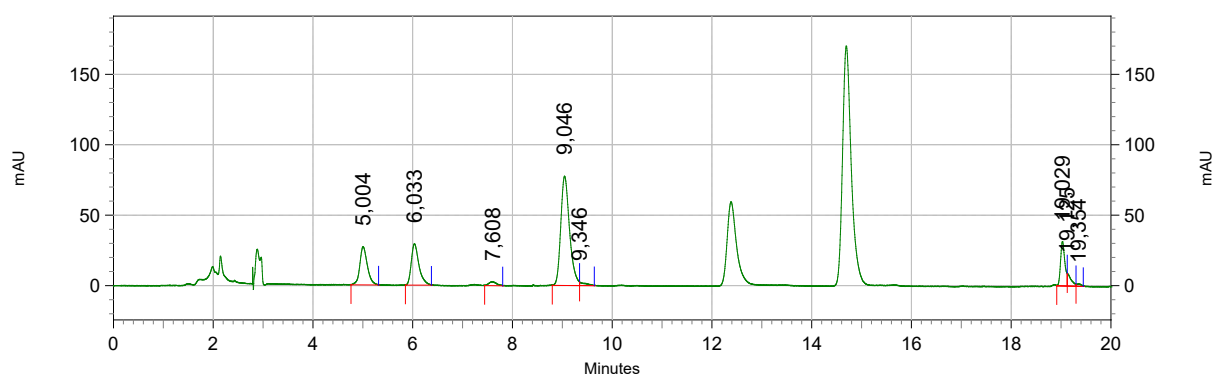

Det 168-440nm

| Name          | Retention Time | Area   | Area Percent |
|---------------|----------------|--------|--------------|
| Neoxanthin    | 5.004          | 282059 | 15.514       |
| Violaxanthin  | 6.033          | 309679 | 17.033       |
| Anteraxanthin | 7.608          | 27690  | 1.523        |
| Lutein        | 9.046          | 940540 | 51.732       |
| Zeaxanthin    | 9.346          | 18281  | 1.006        |
| Alfa carotene | 19.029         | 186486 | 10.257       |
| Beta carotene | 19.125         | 44938  | 2.472        |

400 mM NaCl, T= 45°C

7

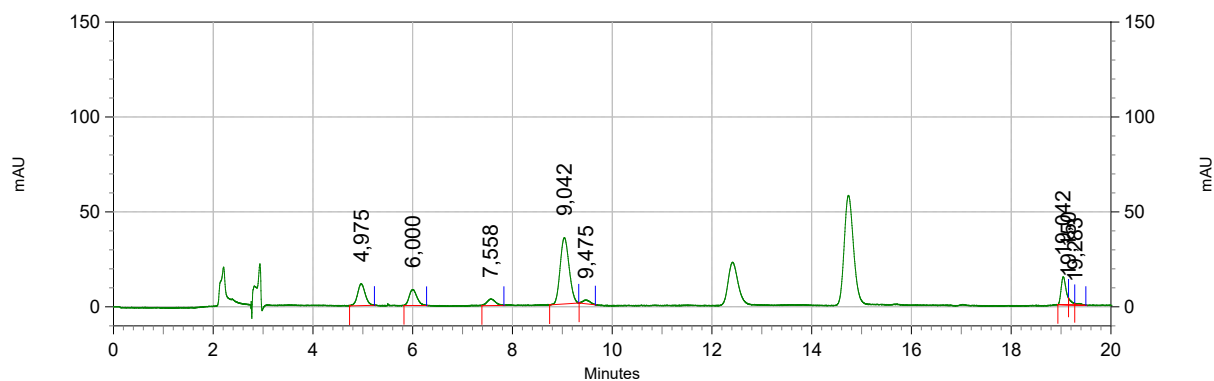

Det 168-440nm

| Name          | Retention Time | Area   | Area Percent |
|---------------|----------------|--------|--------------|
| Neoxanthin    | 4.975          | 122389 | 14.729       |
| Violaxanthin  | 6.000          | 91221  | 10.978       |
| Anteraxanthin | 7.558          | 40777  | 4.907        |
| Lutein        | 9.042          | 435877 | 52.457       |
| Zeaxanthin    | 9.475          | 19865  | 2.391        |
| Alfa carotene | 19.042         | 99511  | 11.976       |
| Beta carotene | 19.150         | 13770  | 1.657        |

12

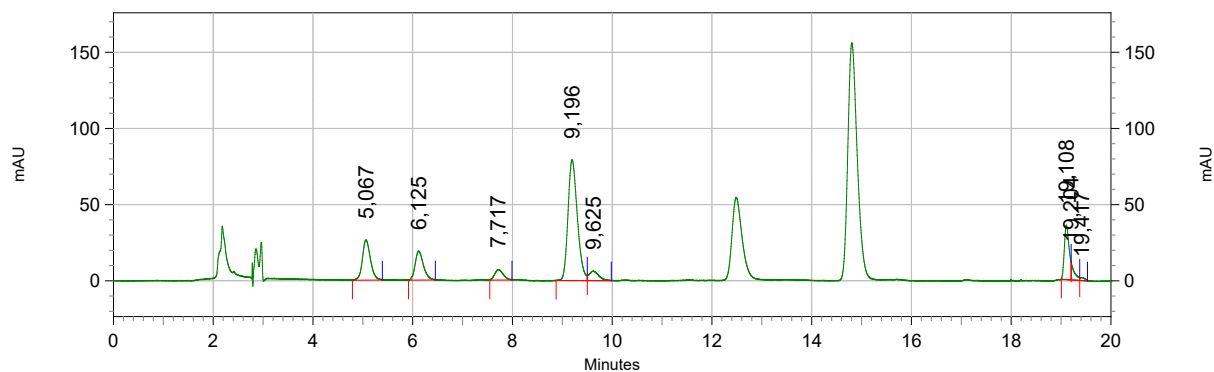

Det 168-440nm

| Name          | Retention Time | Area    | Area Percent |
|---------------|----------------|---------|--------------|
| Neoxanthin    | 5.067          | 293826  | 14.831       |
| Violaxanthin  | 6.125          | 215572  | 10.881       |
| Anteraxanthin | 7.717          | 77173   | 3.895        |
| Lutein        | 9.196          | 1024795 | 51.727       |
| Zeaxanthin    | 9.625          | 79204   | 3.998        |
| Alfa carotene | 19.108         | 234126  | 11.818       |
| Beta carotene | 19.204         | 45784   | 2.311        |

15

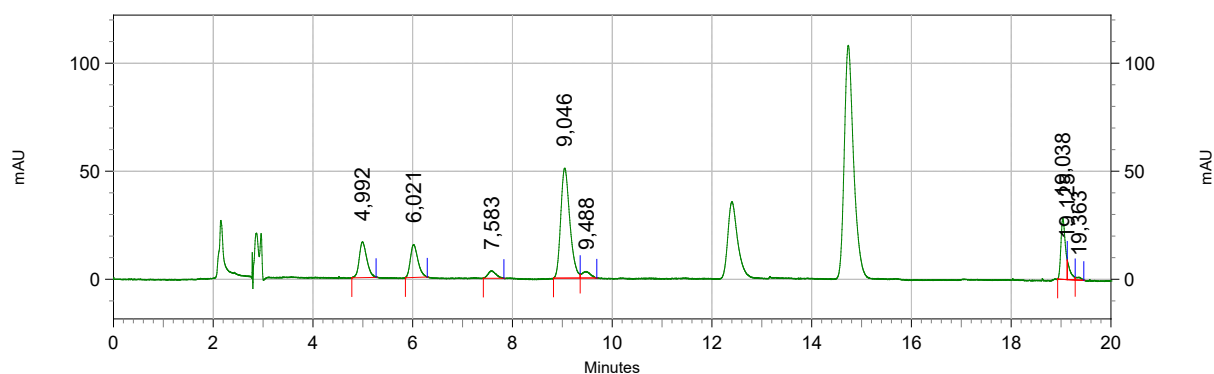

Det 168-440nm

| Name          | Retention Time | Area   | Area Percent |
|---------------|----------------|--------|--------------|
| Neoxanthin    | 4.992          | 174517 | 13.767       |
| Violaxanthin  | 6.021          | 159682 | 12.597       |
| Anteraxanthin | 7.583          | 37852  | 2.986        |
| Lutein        | 9.046          | 643504 | 50.763       |
| Zeaxanthin    | 9.488          | 34514  | 2.723        |
| Alfa carotene | 19.038         | 172461 | 13.605       |
| Beta carotene | 19.125         | 35721  | 2.818        |

21

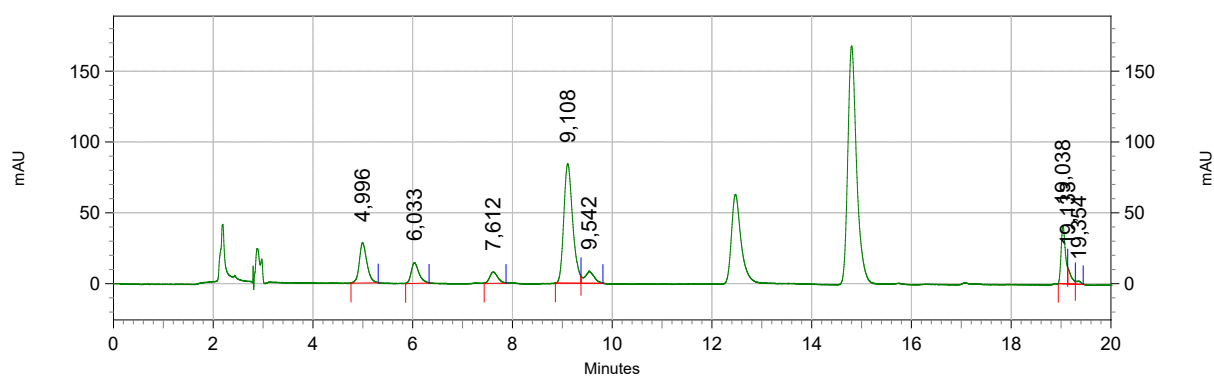

Det 168-440nm

| Name          | Retention Time | Area    | Area Percent |
|---------------|----------------|---------|--------------|
| Neoxanthin    | 4.996          | 295837  | 14.909       |
| Violaxanthin  | 6.033          | 154489  | 7.786        |
| Anteraxanthin | 7.612          | 86467   | 4.358        |
| Lutein        | 9.108          | 1038344 | 52.330       |
| Zeaxanthin    | 9.542          | 106579  | 5.371        |
| Alfa carotene | 19.038         | 240881  | 12.140       |
| Beta carotene | 19.133         | 49351   | 2.487        |
